# Supplementary material
Source: HighWire-hosted journal article supplement (https://www.qdcxjkg.com/highwire/filestream/113561/field_highwire_adjunct_files/11/39_Clara1935.pdf)
Supplement: 39_Clara1935.pdf [file 39_Clara1935.pdf]

Reference no. 39 of

Winkelmann A, Noack T: The Clara cell – a 'Third Reich eponym'? *Eur Respir J* 2010; 36: 722–727

Clara M: Letter to the State Ministry of Education for Saxony, dated 8 April 1935. *Archive: Bundesarchiv Berlin Signature: R3001/21478*, p. 3023.

**Short comment by the authors:**

With this letter, Max Clara asks the Ministry of Education to urge the Ministry of Justice to change the law to the effect that dissection of the bodies of the executed could be performed "in every case" (*in jedem Falle*), even if the relatives expressed the wish to claim the body. Clara stresses the importance of "material from the executed" (*Material von Hingerichteten*) for histological research and teaching.

Anlage A.

Anatomische Anstalt  
Universität Leipzig.

Leipzig-C.1, den 8. April 1935.

Betr.: Sektion von  
Hingerichteten.

An

das Staatsministerium für Volksbildung

D r e s d e n .

Nach den bestehenden gesetzlichen Bestimmungen müssen die Leichen der Hingerichteten über Wunsch der Angehörigen von der Anatomischen Anstalt ausgeliefert werden, ohne daß die Sektion der Leichen vorgenommen werden kann.

Bei der Wichtigkeit, welche gerade dem Material von Hingerichteten für die Untersuchung der feineren Bauverhältnisse beim Menschen zukommt, erscheint die im vorstehenden angeführte Gesetzesbestimmung einer dringlichen Abänderung in dem Sinne bedürftig, daß die Leichen der Hingerichteten in jedem Falle, d.h. auch wenn von den Angehörigen die Auslieferung zwecks Bestattung beantragt wird, sezirt werden dürfen.

Nur auf diese Weise ist es möglich, ein wissenschaftlich einwandfreies Material von unveränderten, gesunden menschlichen Organen zu sammeln und nicht nur für die Forschung, sondern auch für den Unterricht (histologische Übungen) nutzbar zu machen; das anderweitig gesammelte Material ist für viele Organsysteme (Magen-Darm-kanal, Nebenniere usw.) fast durchweg unbrauchbar.

Da in Preussen die gesetzlichen Bestimmungen in dem von mir vorgeschlagenen Sinne lauten, dürfte es auch für Sachsen nicht schwer sein, eine derartige Regelung zu erreichen.

Ich erlaube mir daher den Antrag zu stellen, das Ministerium für Volksbildung möge in dem eben ausgeführten Sinne beim Justizministerium vorstellig werden.

Heil Hitler  
Ges.-Dr. Glars.

Vorstand der Anatomischen Anstalt.

51/19057/35
